## **RUNNING HEAD: Mood swings development and its biological mechanisms**

### **Mood variability during adolescent development and their relation to sleep and brain development**

Yara J. Toenders<sup>1,2,3</sup>, Renske van der Cruijssen<sup>3</sup>, Jana Runze<sup>4</sup>, Suzanne van de Groep<sup>3</sup>, Lara Wierenga<sup>1,2</sup>, Eveline A. Crone<sup>1,2,3</sup>

1. Developmental and Educational Psychology, Leiden University, the Netherlands
2. Leiden Institute for Brain and Cognition, Leiden University, The Netherlands
3. Department of Psychology, Education and Child Studies, Erasmus University Rotterdam, the Netherlands
4. Clinical Child and Family Studies, VU University Amsterdam, the Netherlands

#### **Correspondence:**

Yara J. Toenders

Developmental and Educational Psychology, Leiden University, the Netherlands

Wassenaarseweg 52, 2333 AK Leiden, the Netherlands

[y.j.toenders@fsw.leidenuniv.nl](mailto:y.j.toenders@fsw.leidenuniv.nl)

+31 6 23 99 30 98

**Key words:** adolescence, mood variability, brain structure, sleep, actigraphy, anxiety, depression

## **Abstract**

**Background:** Mood swings, or mood variability, are associated with negative mental health outcomes. Since adolescence is a time when mood disorder onset peaks, mood variability during this time is of significant interest. Understanding biological factors that might affect mood variability, such as sleep and structural brain development, could elucidate the mechanisms underlying mood disorders.

**Methods:** Data from the longitudinal Leiden Self-Concept study (N=171) over 5 timepoints was used to study the association between sleep, brain structure, and mood variability in healthy adolescents aged 11-21 at baseline in this pre-registered study. Sleep was measured both objectively, using actigraphy, as well as subjectively, using a daily diary self-report. Negative mood variability was defined as day-to-day negative mood swings over a period of 5 days after an MRI scan.

**Results:** It was found that negative mood variability peaked in mid-adolescence, and average negative mood showed a similar pattern. Sleep duration (subjective and objective) generally decreased throughout adolescence. Mood variability was not associated with sleep, but average negative mood was associated with higher self-reported lower energy. In addition, higher thickness in the dorsolateral prefrontal cortex (dlPFC) compared to same-age peers, suggesting a delayed thinning process, was associated with higher negative mood variability in early and mid-adolescence. Lastly, higher mood variability preceded higher levels of anxiety and depression, as well as current anxiety and depression.

**Conclusions:** Together, this study provides an insight into the development of mood variability and its association with brain structure.

## Introduction

Mood variability, or emotional instability, refers to fluctuations in mood over time (1). Mood variability undergoes significant changes during adolescence (2) and has been associated with negative mental health outcomes, such as an increased risk of developing anxiety and depression (3–5). Since psychopathology has a peak onset during adolescence (6), it is highly important to study risk factors underlying mental disorders during development. The goal of this study was to provide a comprehensive analysis of the developmental pattern of mood variability in adolescence and to examine two biological mechanisms that may account for these developmental patterns: sleep changes (7) and structural brain development (8).

Mood variability has previously been studied for both positive (e.g., happiness, vigor) and negative (e.g., sadness, anger, tension) emotions (9). Mood variability is typically assessed using daily assessment of mood states, for example through self-report questionnaires, in which participants are asked to rate their mood across several days. This allows for the assessment of both general mood as well as daily fluctuations (10). Prior studies described several developmental patterns, although these are usually based on limited developmental time frames. First, one prior study described that female adolescents (10-14 years at the first time point) showed an increase in mood variability over a 4-year period (Larson et al., 2002), suggesting a rise in mood variability in adolescence. In contrast, a second longitudinal study in adolescents starting from the age of 13 years showed that mood variability for happiness, sadness and anger linearly decreased over a five-year period (12). Furthermore, it was found that in mid-adolescence emotion regulation strategies were used less compared to early and late adolescence (13). It is therefore thought that mood variability peaks in mid-adolescence, possibly associated with less efficient emotion regulation strategies, followed by a decrease into adulthood.

Prior studies have suggested an important link between mood states and sleep (14). During the developmental period of adolescence, melatonin release shifts to a later time, leading to a later bedtime, and thereby often causing sleep deprivation (15,16). Problems with sleep are often seen in people with mental disorders, and insomnia is even a diagnostic criterion for depression (17). Moreover, sleep problems have been identified to increase the risk for psychopathology onset later in life (18–20). Prior research showed that adolescents whose sleep was restricted to 6.5 hours per night reported worse emotion regulation compared to adolescents who slept almost 9 hours per night, but the relation with mood variability is still unclear (21). During development, total sleep duration decreases, which has been assessed using both subjective and objective measures (14,22,23). Most prior studies examining mood and sleep were cross-sectional and included adolescents of a narrow age-range, which limits the possibility to examine developmental changes. Longitudinal studies are therefore needed to study the effect of ‘natural’ sleep deprivation, which adolescents often experience, on mood variability (7). Due to the discrepancy between objective and subjective sleep measures, such as actigraphy underestimating sleep due to sleep motor activity, it is of importance that the association between both measures of sleep and mood variability are assessed (23).

In addition to sleep related changes, structural brain development may be related to changes in mood and maturation of emotion regulation strategies (24). During adolescence, cortical thickness of the prefrontal cortex and other cortical regions consistently reduces (25–27), and both delays and accelerations of this developmental process have been associated to mood disorders such as depression and anxiety (8,26,28,29). Brain regions that are of particular interest for the relation to mood variability because of their involvement in emotion regulation include the prefrontal cortex (PFC), more specifically the ventrolateral (vlPFC) and dorsolateral (dlPFC) regions, as well as the anterior cingulate cortex (ACC), ventral striatum (VS), amygdala, and orbitofrontal cortex (OFC) (30–33). Neuroscience models previously suggested that these regions do not develop simultaneously, as subcortical brain regions

such as the amygdala and ventral striatum are thought to develop in a faster fashion than cortical brain regions such as the dlPFC and vlPFC (34,35). It could be argued that this imbalance might lead to emotional instability.

Taken together, there is some evidence that mood variability is developing throughout adolescence (2,11) and heightened levels of mood variability possibly have a negative effect on mental health (36,37), but this question has not yet been examined using longitudinal measures across the whole range of adolescence. In addition, the contributions of two potential mechanisms, sleep (14) and neural development (8), on the development of mood variability remain unknown. Therefore, the present study had three aims: 1) to study the development of mood variability throughout adolescence in a longitudinal sample, 2) to study the relation between sleep, brain structure and mood variability, 3) to examine if mood variability during adolescence can predict anxiety and depressive symptoms.

We examined these questions in a pre-registered (<https://osf.io/xmbg4/>) comprehensive longitudinal study including three waves of neural development and daily variability in mood and sleep in adolescents between 11-24 years of age. We hypothesized that (a) mood variability develops in an inverted U-shape, (b) sleep decreases throughout development, (c) lower sleep length is associated with higher mood variability, (d) brain development of regions involved in emotion regulation is associated with mood variability, and (e) higher mood variability precedes symptoms of anxiety and depression.

## Methods and materials

### Participants

In this study, data from adolescents from the Leiden Self-Concept Study was used (38,39). The Leiden Self-Concept Study is a longitudinal study with 5 time points. Participants were aged 11–21 years at the first time point. They were followed for three consecutive years with lab visits, and two additional years with online questionnaires. Healthy adolescents (N=171) took part in the study (Table 1, Supplementary Table S1). Exclusion criteria included the following: being left-handed, not having normal or corrected-to-normal vision, neurological or psychiatric diagnoses, and usage of psychotropic medication. Participants and parents of participants younger than 18 years signed informed consent. The study (NL54510.058.16) was approved by the Medical Ethics Committee of the Leiden University Medical Centre (LUMC).

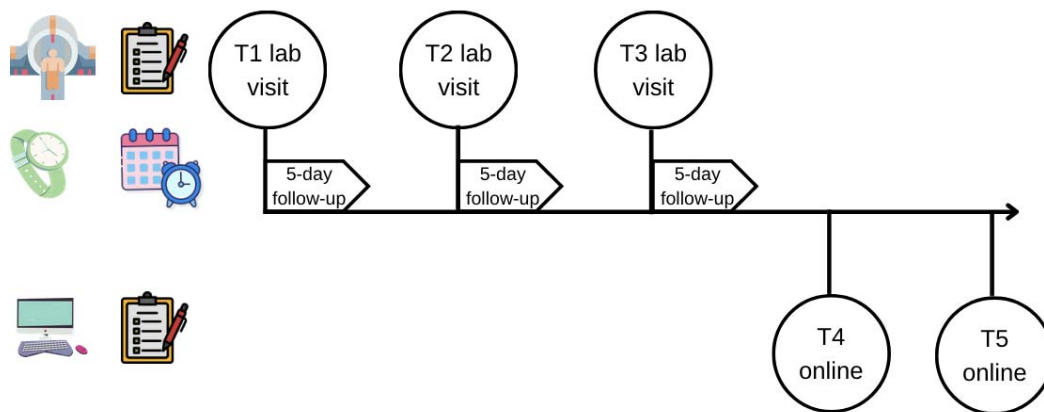

**Figure 1. Timeline of the Leiden Self-Concept Study.** At the first three time points, participants visited the lab to undergo an MRI and fill out questionnaires. In the 5 days after the lab visit, participants reported their daily mood and sleep in a diary, and sleep was measured using a wristband that detected motion. Participants were given the option to

participate in two follow-up visits that only entailed filling out questionnaire measures at home.

## ***Measures***

### *Mood variability*

The Profiles of Mood States (POMS) questionnaire was used to assess daily mood (40). In this questionnaire participants were asked to rate 32 adjectives on a 5-point Likert scale to which degree the adjective described their current mood. The POMS questionnaire consists of 5 subscales: anger, depression, fatigue, tension, and vigor. Mood variability was calculated per subscale as the absolute difference between successive days (12). These scores per day were summed and then divided by the number of consecutive days the participants rated their mood. Total mood variability was defined as the sum of the mood instability on the subscales. Only participants with ratings on 3 or more consecutive days were included. Higher scores indicate a higher mood variability. In addition, the total average mood was calculated by summing the averaged subscales and subtracting the average of the vigor subscale. Missing items were imputed using predictive mean matching from the 'mice' package in R (41).

### *Sleep measures*

Objective and subjective measures of sleep were included. Actigraphy watches were used to measure sleep duration and sleep efficiency objectively and using daily diaries subjective sleep duration and energy levels were assessed on the same days (Supplementary Methods).

### *Anxiety and depressive symptoms*

The Revised Child Anxiety and Depression Scale (RCADS) was used to assess the participants' feelings of anxiety and depression. Participants rated 47 questions on a Likert scale of 0–3. The answers were summed to create two subscales: total anxiety (sum of the

anxiety subscales) and total depression (42). Up to two missing items were allowed per subscale. Missing items were replaced by prorating the other items within the subscale.

### *MRI acquisition*

MRI scans for the three waves were acquired on a Philips Ingenia 3.0 Tesla MR scanner. A standard whole-head coil was used. First, functional scans were obtained, followed by a high-resolution 3D T1-FFE scan (TR=9.72 ms, TE=4.6 ms, flip angle=8°, 140 slices, voxel size=0.875x0.875x0.875 mm, FOV=224x178.5x168 mm). Participants watched a film while they were in the MRI.

### *MRI processing*

The MRI data was processed in the longitudinal stream in FreeSurfer 6.0 (<https://surfer.nmr.mgh.harvard.edu/>) (43,44). Parcellation of the cortex was based on the Desikan-Killiany atlas and Fischl atlas for subcortical regions (45,46). Regions of interest were selected based on prior literature on emotion regulation. Cortical thickness and surface area of the following regions were included: dlPFC, vlPFC, ACC, and OFC, as well as volume of the following regions: ventral striatum and amygdala. The average of the left and right hemisphere was used.

The regions-of-interest were constructed by combining the following regions (8,47–49): dlPFC: superior frontal, rostral middle frontal cortex and caudle middle frontal, vlPFC: pars opercularis, pars triangularis and pars orbitalis, ACC: rostral ACC and caudal ACC, OFC: lateral orbitofrontal cortex and middle orbitofrontal cortex and ventral striatum: caudate, putamen and nucleus accumbens. This resulted in a total of 6 ROIs, which consisted of 4 cortical thickness, 4 cortical surface area, and 2 subcortical volume measures. The quality of the T1 images was assessed using Qoala-T (50). Parts of these data were previously published (51,52).



## **Statistical analyses**

Generalized additive mixed models (GAMMS) were used to study the development of mood variability and its association with sleep and brain structure. Generalized additive mixed models (GAMMs) are semi-parametric models that use penalized smoothing splines (53) (Supplementary Methods).

First, an exploratory analysis was performed on the subscales (tension, anger, depression, fatigue, and vigor) to test for developmental patterns. Based on these findings, we created separate models for negative mood variability and average negative mood score, based on the first four subscales (see Supplementary Material). The main analyses (analyses 1 to 4 described below) were therefore done using these negative mood measures, as well as the general mood variability and average mood.

Data from the first three timepoints were used in the first four analyses, to study:

- 1) the development of mood variability (by testing the effect of age by sex on mood variability).

$$\text{Mood variability}_{ij} = \beta_0 + s1(\text{Age}_{ij})\text{Sex}_i + u_i + \text{error}_{ij}$$

- 2) the development of sleep (by testing the effect of age by sex on sleep (separately for sleep duration, sleep efficiency, subjective sleep duration, energy level)).

$$\text{Sleep}_{ij} = \beta_0 + s1(\text{Age}_{ij})\text{Sex}_i + u_i + \text{error}_{ij}$$

- 3) the association between mood variability and sleep (separately for each sleep measure, scaled by age) over time corrected for age and sex:

$$\text{Mood variability}_{ij} = \beta_0 + s1(z\text{Sleep}_{ij}) + s2(\text{Age}_{ij})\text{Sex}_i + s3(z\text{Average Mood}_{ij}) + u_i + \text{error}_{ij}$$

- 4) the association between mood variability and brain structure (scaled by age) over time corrected for age and sex.

$$\text{Mood variability}_{ij} = \beta_0 + s1(zROI_{ij}) + s2(\text{Age}_{ij})\text{Sex}_i + s3(z\text{AverageMood}_{ij}) + u_i + \text{error}_{ij}$$

The same analyses were repeated for average mood. In each analysis,  $i$  = subject,  $j$  = time point and  $u_i$  = random effect per subject. The analyses for mood variability and average mood were FDR corrected per question to correct for multiple testing. For analysis 4 it was corrected per brain measure (volume, surface area and thickness).

A thin plate spline was used to fit the data. Model fit, to choose the best  $k$ , was assessed using the BIC.  $k$  represents the basis dimensions, the maximum degrees of freedom for a smoothing spline. The 'mgcv' package in R was used for the analyses (54). Participants were added as a random effect and restricted maximum likelihood (REML) was used for smoothness selection. The interaction effect of age and sex was included to test whether the development of mood variability differed between sexes. In analyses 3 and 4, sleep and brain structure were transformed into z-scores by scaling them to age. Participants with a large ROI or longer sleep duration at a certain age compared to their same-age peers had a higher z-score.

Several control analyses were conducted. The analyses for mood variability were corrected for average mood (2,10). In addition, for analyses 2 and 3, the analyses were repeated with an additional covariate to correct for whether the participant was on holiday or at school/work. The analyses with objective sleep measurements were also repeated separately for weekend and weekdays.

To study the prediction of anxiety and depressive symptoms based on the development of mood variability, a linear regression was used to predict average symptoms at follow-up

based on the average level of mood variability (55,56). The analysis was corrected for the baseline level of anxiety and depressive symptoms by adding the mean level of anxiety or depressive symptoms at the first three waves as a covariate.

## Results

Data from 171 participants over 5 time points were included, leading to a total of 661 observations (Table 1, Supplementary Table S1).

**Table 1. Overview participants over 5 time points.** Mean (SD) are being displayed.

|                                    | <b>Time point 1 (N=161)</b> | <b>Time point 2 (N=168)</b> | <b>Time point 3 (N=175)</b> | <b>Time point 4 (N=117)</b> | <b>Time point 5 (N=40)</b> |
|------------------------------------|-----------------------------|-----------------------------|-----------------------------|-----------------------------|----------------------------|
| <b>Sex N (%)</b>                   |                             |                             |                             |                             |                            |
| Male                               | 71 (44.1%)                  | 78 (46.4%)                  | 81 (46.3%)                  | 55 (47.0%)                  | 67 (47.9%)                 |
| Female                             | 83 (51.6%)                  | 81 (48.2%)                  | 88 (50.3%)                  | 62 (53.0%)                  | 73 (52.1%)                 |
| <b>Age</b>                         | 15.3 (2.92)                 | 16.0 (3.21)                 | 17.5 (3.46)                 | 18.9 (3.39)                 | 20.0 (3.72)                |
| <b>Education N (%)</b>             |                             |                             |                             |                             |                            |
| Primary school                     | 30 (19.1%)                  | 24 (14.3%)                  | 7 (4.0%)                    |                             |                            |
| High school                        | 85 (52.8%)                  | 87 (51.8%)                  | 80 (45.7%)                  |                             |                            |
| Higher education                   | 39 (24.2%)                  | 48 (28.6%)                  | 83 (47.4%)                  |                             |                            |
| <b>Country of birth N (%)</b>      |                             |                             |                             |                             |                            |
| Netherlands                        | 147 (91.3%)                 | 152 (90.5%)                 | 161 (92.0%)                 |                             |                            |
| Turkey                             | 0 (0%)                      | 0 (0%)                      | 1 (0.6%)                    |                             |                            |
| Netherlands Antilles               | 1 (0.6%)                    | 1 (0.6%)                    | 1 (0.6%)                    |                             |                            |
| Other                              | 6 (3.7%)                    | 6 (3.6%)                    | 7 (4.0%)                    |                             |                            |
| <b>Mood variability (negative)</b> | 8.41 (5.72)                 | 8.93 (6.29)                 | 9.39 (6.02)                 |                             |                            |
| <b>Average mood (negative)</b>     | 10.8 (10.7)                 | 12.2 (11.3)                 | 13.5 (10.7)                 |                             |                            |
| <b>Mood variability</b>            | 11.7 (6.26)                 | 12.2 (7.16)                 | 12.5 (6.54)                 |                             |                            |
| <b>Average mood</b>                | 3.09 (12.3)                 | 4.08 (12.7)                 | 6.04 (12.7)                 |                             |                            |
| <b>Subjective sleep duration</b>   | 9.26 (1.08)                 | 9.16 (0.94)                 | 9.02 (0.97)                 |                             |                            |
| <b>Sleep Energy</b>                | 2.89 (0.54)                 | 2.83 (0.53)                 | 2.70 (0.58)                 |                             |                            |
| <b>Objective sleep duration</b>    | 7.73 (0.86)                 | 7.58 (1.22)                 | 7.35 (1.03)                 |                             |                            |
| <b>Sleep Efficiency (%)</b>        | 93.0 (5.63)                 | 91.8 (8.13)                 | 92.1 (7.61)                 |                             |                            |
| <b>Total anxiety</b>               | 19.5 (11.8)                 | 15.6 (9.99)                 | 23.1 (14.4)                 | 26.6 (13.8)                 | 28.4 (17.2)                |
| <b>Total depressive symptoms</b>   | 5.72 (3.74)                 | 5.65 (3.95)                 | 7.10 (4.53)                 | 7.49 (4.65)                 | 9.63 (5.96)                |

*Development of mood*

The development of mood based on all 5 subscales of the POMS has been reported in the supplementary materials. The development of mood was further examined using only the four negative subscales of the POMS (tension, depression, anger, and fatigue), as it was found that the positive subscale (vigor) was not associated with age-related changes.

First, we tested for sex differences in average mood and mood variability. This analysis showed that females had higher negative mood variability and negative average mood than males ( $p=0.02$ ,  $p=0.02$ ), therefore in all subsequent analyses the age by sex interaction was examined. The best-fit model of the age by sex interaction on negative mood variability and negative average mood can be observed in Figure 2 (BIC: 2028.89,  $p<0.001$ ,  $k=4$ ; BIC: 2512.30,  $p=0.002$ ). Negative mood variability showed a peak during mid-adolescence for females, showing a rapid increase and a modest decrease across adolescence (BIC: 1066.82,  $p=0.02$ ,  $k=4$ ; Figure 2 and Supplementary Figure S6). For males, negative mood variability increased throughout adolescence (BIC: 705.65,  $p=0.03$ ,  $k=4$ ). Individual trajectories of mood variability are displayed in Supplemental Figure S7. Negative average mood increased during early adolescence, also showed a peak during mid-adolescence and a decline during late adolescence for females but did not show an association with age in males (BIC: 1319.27,  $p<0.001$ ,  $k=4$ ; BIC: 1018.82,  $p=0.66$ ,  $k=4$ ).

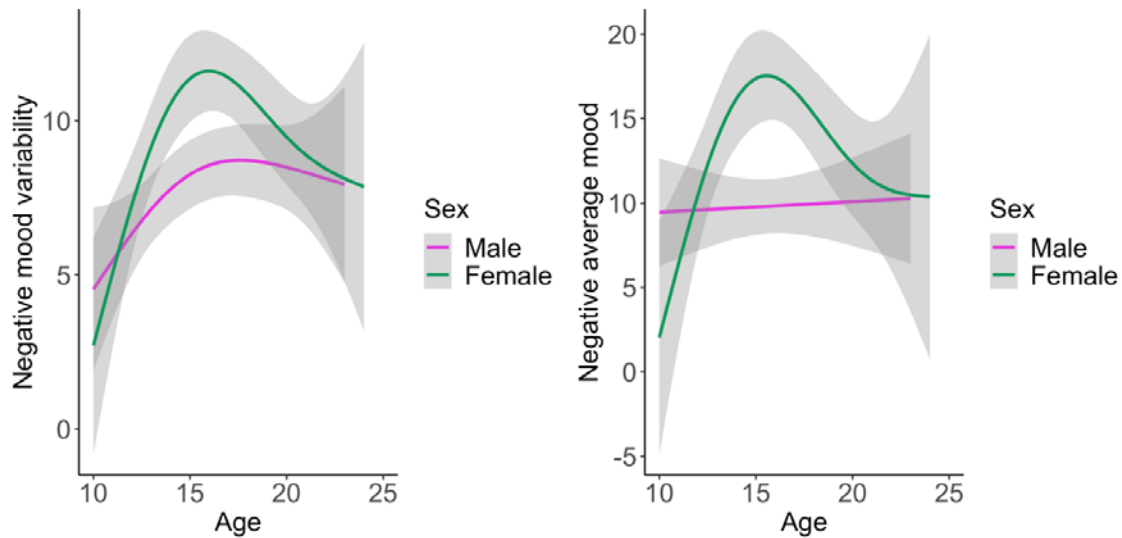

**Figure 2. Best-fit model of negative average mood and negative mood variability**

**development by sex.** Left: average negative mood based in four POMS subscales (depression, anger, tension, and fatigue), Right: negative mood variability, showing fluctuations in mood across 5 days.

#### *Development of sleep*

Next, the development of sleep: objective sleep duration, objective sleep efficiency, subjective sleep duration and subjective energy level, was investigated. The best-fit model for the age by sex interaction effects are displayed in Table 2, Figure 3, and Supplementary Figure S8.

There was a significant age by sex interaction for objective and subjective sleep duration. Objective and subjective sleep duration decreased for both males and females, but in males there was a subsequent flattening in late adolescence. Objective sleep efficiency did not show an age by sex interaction. However, subjective energy level decreased throughout adolescence, for both males and females.

**Table 2. Best-fit model of sleep development.**

| Sleep measure | Age * sex interaction ( $p_{FDR}$ ) | BIC (k) | Association with negative | BIC (k) | Association with negative | BIC (k) |
|---------------|-------------------------------------|---------|---------------------------|---------|---------------------------|---------|
|---------------|-------------------------------------|---------|---------------------------|---------|---------------------------|---------|

|                             |        | average mood ( $p_{FDR}$ ) |        | mood variability ( $p_{FDR}$ ) |      |             |
|-----------------------------|--------|----------------------------|--------|--------------------------------|------|-------------|
| Sleep duration (objective)  | <0.001 | 1967.91 (3)                | 0.50   | 1122.98 (3)                    | 0.91 | 898.89 (3)  |
| Sleep efficiency            | 0.134  | 1269.87 (3)                | 0.17   | 1121.57 (3)                    | 0.94 | 862.20 (3)  |
| Sleep duration (subjective) | <0.001 | 877.30 (3)                 | 0.68   | 2292.06 (3)                    | 0.94 | 1761.15 (3) |
| Energy level                | 0.003  | 692.04 (3)                 | <0.001 | 2420.67 (3)                    | 0.94 | 1844.75 (3) |

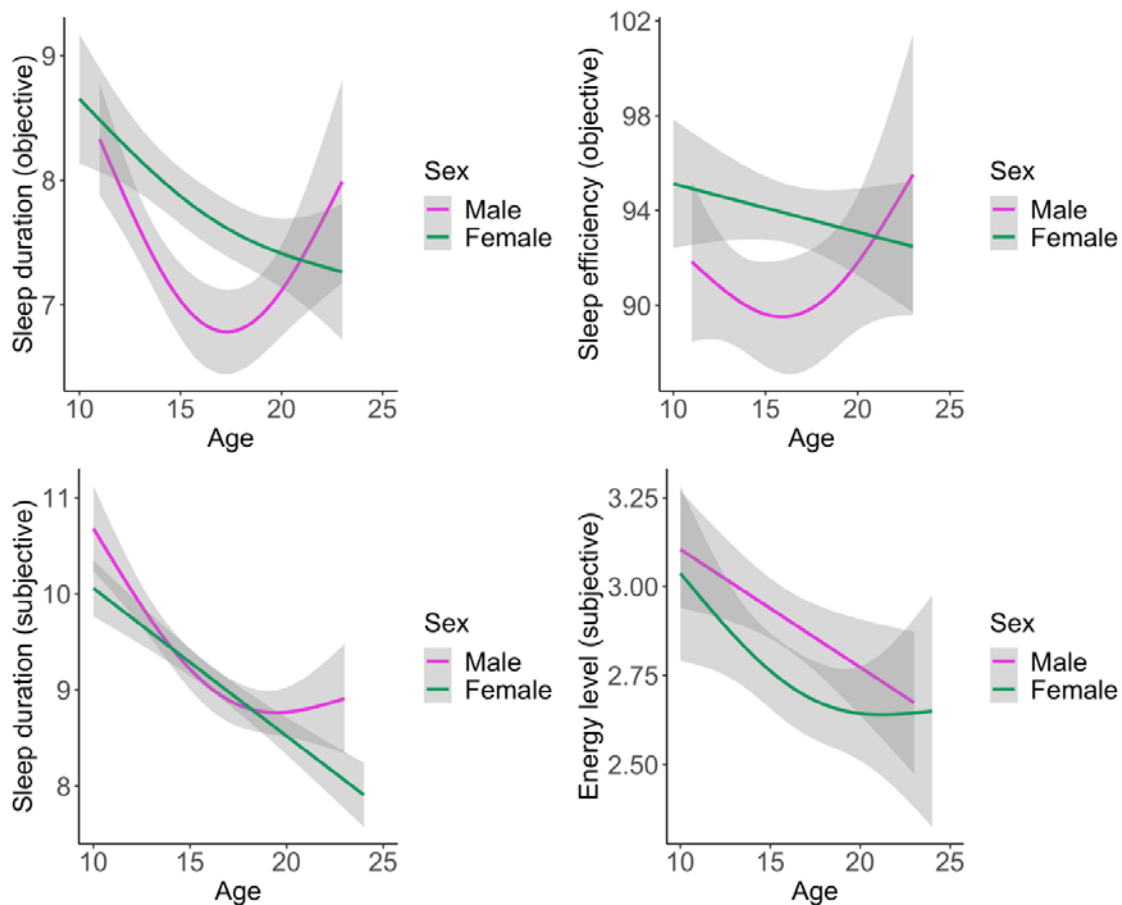

**Figure 3. Best-fit model of sleep development by sex.** Upper left: objective sleep duration, upper right: objective sleep efficiency, lower left: subjective sleep duration, lower right: energy level.

### *Association between sleep and mood throughout adolescence*

To study the association between sleep measures and mood, sleep measures were scaled to age. Sleep duration and sleep efficiency were not associated with negative mood variability or average mood. The best-fit models showed that energy level and negative mood variability (BIC: 2483.68,  $p_{\text{FDR}} < 0.001$ ,  $k=3$ ) showed an association, however, this association did not survive correction for average negative mood (Table 2). A second association was also observed between energy level and average negative mood (BIC: 2149.39,  $p_{\text{FDR}} = 0.009$ ,  $k=3$ ). People with lower level of energy compared to their age-matched peers showed higher negative mood throughout development (Figure 4). Subsequent control analyses confirmed that no effect of holidays was found, and the results did not change when the analyses were repeated separately for weekends and weekdays.

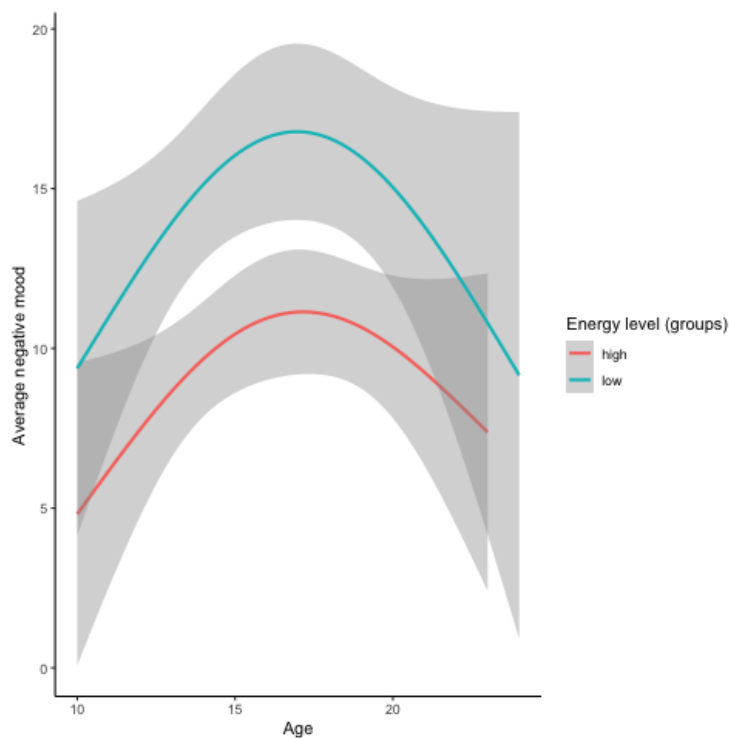

**Figure 4. Mood variability development in groups with high or low levels of energy** (subjective measure of sleep). Subjects are divided into groups only to visualise the effect.



### *Association between brain structure and mood throughout adolescence*

Next, the association between brain structure and mood was examined. Consistent with prior studies (51,52), cortical thickness for all regions decreased during adolescent development (for example: dIPFC in Figure 5A).

Negative mood variability showed an association with dIPFC thickness (BIC: 1792.19,  $p_{FDR}=0.04$ ,  $k=3$ ). Those participants with higher dIPFC thickness compared to same-age peers showed higher levels of negative mood variability in early and mid-adolescence (Figure 5B). Negative average mood was not associated with brain structure. None of the other brain regions showed associations with negative mood variability or average mood.

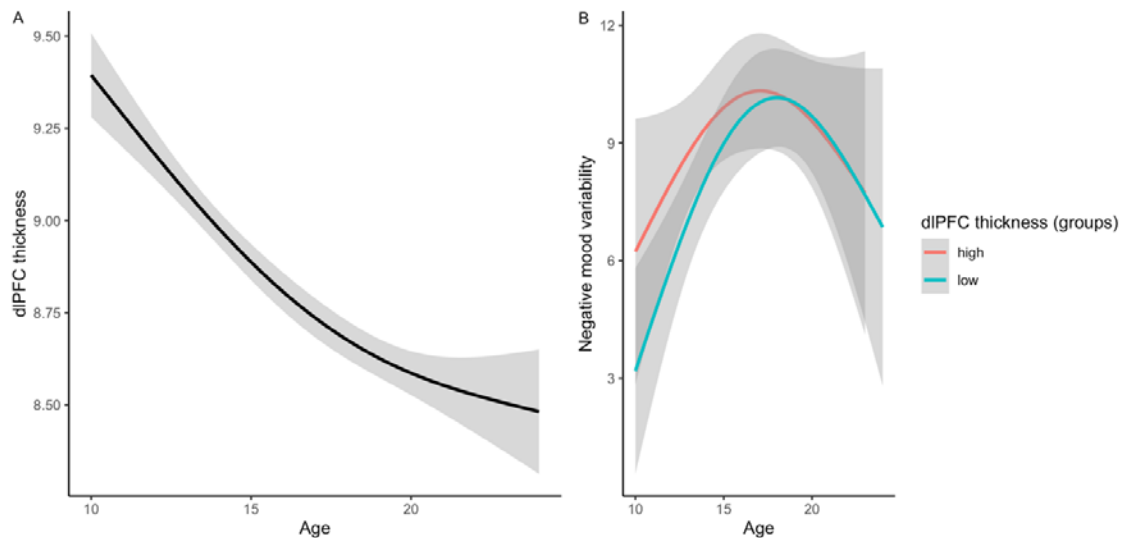

**Figure 5. Development of dIPFC thickness (A) and mood variability development in groups with high or low dIPFC (B).** Subjects are divided into groups only to visualise the effect.

### *Association between mood variability and future anxiety and depressive symptomatology*

The final aim was to investigate the association between mood variability and mental health, specifically whether mood variability preceded anxiety and depressive symptoms. It was found that mean mood variability at wave 1 to 3 preceded higher anxiety and depressive symptoms at wave 4 and 5 (depression:  $B=0.22$ ,  $p=0.004$ ; anxiety:  $B=1.02$ ,  $p<0.001$ ).

Finally, we tested whether this effect remained after correcting for average anxiety and depressive symptoms over wave 1 to 3, but it did not survive this correction (depression:  $B=-0.04$ ,  $p=0.61$ ; anxiety:  $B=0.31$ ,  $p=0.14$ ).

## Discussion

The present study used a longitudinal design to examine the development of day-to-day mood variability during adolescent development. As predicted, negative mood variability peaked in mid-adolescence but only for females, whereas males showed linear increases in negative mood variability with age and lower levels of mood variability overall, consistent with prior research (2,11). Objective and subjective sleep duration dropped in mid-adolescence and males but not females showed a subsequent flattening in sleep duration. Sleep duration was not associated with mood variability, but subjective energy levels were negatively associated with average mood (see also (14)). Lastly, consistent with prior research dorsolateral prefrontal cortex thickness declined with age ((28)), and negative mood variability showed an association with the development of thickness in the dorsolateral prefrontal cortex.

Our first aim was to provide a longitudinal assessment of mood variability in adolescence. Due to the developmental patterns of mood, we specifically focused on negative mood (9). The timing of the peak seen in mood variability was slightly later compared to previous research where a decrease was seen after age 13-years (2). Additionally, this peak overlapped with the peak in average negative mood seen in females, showing that females not only showed larger mood swings but also an on average more negative mood in mid-adolescence. The development of mood variability was especially of interest because of its association with depression and anxiety, and onset of these psychiatric disorders peaks during adolescence (57). Larger mood variability preceded anxiety and depressive symptoms over the following two years, suggesting that mood variability may be a susceptibility marker for internalizing disorders, which are higher in females than males (58). However, while mood swings are associated with future negative mood, this is mostly explained by its association with current negative mood.

The findings of a decrease in sleep duration (objective as well as subjective) fit well with prior research showing that there are sex differences in sleep development, and that overall, a decrease in sleep duration is observed (14,22). For males, a larger dip was observed for objective sleep duration, followed by a flattening of the duration in older adolescents. Contrary to our predictions, neither objective nor subjective sleep duration were related to mood variability. Notably, developmental patterns associated with sex were inverted for males and females, with females showing a larger peak in mood variability and males showing a larger drop in objective sleep duration. These sex differences are currently not well understood, but some of these effects may be related to social experiences and expectations. For example, males show higher levels of online gaming than females during adolescence (52), possibly resulting in less objective sleeping time in mid-adolescence. In addition, it might be speculated that males might not report their sleep as accurately as females, which is reflected in the discrepancy between the subjective and objective sleep duration.

Despite the absence of a relation between mood variability and sleep, lower subjective energy levels were associated with lower average mood. Even though energy levels decreased during adolescence, the relationship between average mood and energy levels did not change during development, suggesting that decreasing energy levels during adolescence co-occur with generally increasing negative mood. This potentially points to a causal relationship, therefore, increasing sleep duration by for example adjusting school times could be beneficial for mood. These questions should be studied in future research using sleep intervention designs, as the current study, despite being longitudinal, is correlational and cannot draw causal conclusions.

One alternative explanation should be considered; subjective sleep has often been more strongly associated with depressed and anxious mood than objective sleep, which might be due to low mood being associated with the misperception of sleep, meaning that when people experience low mood, they often perceive their sleep as worse (59,60). However, it

could also be that the association is explained by physical activities or other circumstances that could affect energy level, but not sleep duration.

### *Brain structure and mood variability*

One of the mechanisms underlying the increased levels of mood variability in mid-adolescence might be emotion regulation (13). Even though we did not measure emotion regulation strategies directly, we examined whether mood variability was associated with structural brain development of regions involved in emotion regulation (62). A thicker dIPFC was associated with higher levels of negative mood variability in early and mid-adolescence, and a similar pattern was observed for mood variability and vIPFC thickness at trend level. Since adolescence is a time of cortical thinning, this could be interpreted as higher mood variability being associated with a delayed cortical maturation process. While this is the first study to show an association with mood variability, an earlier study, consistent with the current findings, showed that the development of dIPFC and vIPFC thickness was associated with the use of emotion regulation strategies, with greater cortical thinning associated with higher levels of cognitive reappraisal later in life (61). Taken together, dIPFC thickness might be a biological marker that explains why some adolescents are more affected by mood swings than others.

Interestingly, no association between mood variability and limbic regions, the amygdala and ventral striatum, was found. This is however in line with work on the association between emotion regulation and subcortical development, also not reporting a direct association (63). One possible explanation could be that subcortical regions do not show large intra-individual brain volume differences during adolescence and therefore no relation with developmental processes of mood variability (47,64). Differences between surface area and thickness might explain why only an association between mood variability and thickness was found. For example, thickness is more susceptible to environmental influences whereas surface area is more strongly impacted by genetic factors (65). In future research, examining the

maturational coupling or functional activity or connectivity might provide more insight into the role of the subcortical regions in mood variability (66,67).

A few limitations of the current study should be noted. First, the subjective sleep data was subject to recall bias, and the objective data to the adolescents wearing the actigraphy watch correctly. However, the strength of assessing both subjective as well as objective reports of sleep was that the relation of these two aspects of sleep to mood variability could be compared (59). It should be noted that we measured day-to-day variability of mood, whereas within-day variability might show a different pattern and different associations with biological mechanisms. Thus, we might not have picked up on the relation between mood variability and for example sleep because of the sampling rate of mood variability (68,69). Future studies could examine a higher temporal resolution to measure mood variability by applying a method such as ecological momentary assessment (EMA) (70). Finally, the relation to pubertal hormone timing and development was not assessed. Since there were sex differences in the developmental trajectory of mood variability, and mood variability increased throughout puberty in females, hormone levels might play a role. Moreover, hormones have previously been related to brain development, and pubertal timing can affect the risk for developing psychopathology in adolescence (64,71).

In conclusion, this study confirmed the hypothesis of increased levels of mood variability in adolescence with a peak in mid-adolescence, especially in females (2,11), and that higher levels of mood variability are associated with future symptoms of anxiety and depression (36). We found moderate evidence for a relation between average mood and subjective sleep energy levels, and small evidence for a relation between mood variability and structural brain development. Together, these findings suggest that mood variability, sleep duration changes, and neural development are co-occurring in adolescence. Yet, the study also highlighted sex differences which may be associated with different societal expectations and experiences. This study provides initial and important insight into the normative

developmental patterns and biological aspects associated with risk factors for future depressive and anxiety symptoms.

### **Acknowledgments**

This work was supported by the Netherlands Organisation for Scientific Research (NWO-VICI 453-14-001 E.A.C.). We thank all participants to the Leiden Self-Concept study.

### **Disclosures**

The authors declare no conflicts of interests

## References

1. Bailen NH, Green LM, Thompson RJ (2019): Understanding Emotion in Adolescents: A Review of Emotional Frequency, Intensity, Instability, and Clarity. *Emotion Review* 11: 63–73.
2. Maciejewski DF, van Lier PAC, Branje SJT, Meeus WHJ, Koot HM (2015): A 5-Year Longitudinal Study on Mood Variability Across Adolescence Using Daily Diaries. *Child Development* 86: 1908–1921.
3. Maciejewski DF, Van Lier PAC, Neumann A, Van Der Giessen D, Branje SJT, Meeus WHJ, Koot HM (2014): The development of adolescent generalized anxiety and depressive symptoms in the context of adolescent mood variability and parent-adolescent negative interactions. *Journal of Abnormal Child Psychology* 42: 515–526.
4. Neumann A, Van Lier PAC, Frijns T, Meeus W, Koot HM (2011): Emotional dynamics in the development of early adolescent psychopathology: A one-year longitudinal study. *Journal of Abnormal Child Psychology* 39: 657–669.
5. Silk JS, Steinberg L, Morris AS (2003): Adolescents' Emotion Regulation in Daily Life: Links to Depressive Symptoms and Problem Behavior. *Child Development* 74: 1869–1880.
6. Kessler RC, Amminger GP, Aguilar-Gaxiola S, Alonso J, Lee S, Bedirhan Ustun T (2007): Age of onset of mental disorders: A review of recent literature. *Current Opinion in Psychiatry* 20: 359–364.
7. Galván A (2020): The Need for Sleep in the Adolescent Brain. *Trends in Cognitive Sciences* 24: 79–89.
8. Bos MGN, Wierenga LM, Blankenstein NE, Schreuders E, Tamnes CK, Crone EA (2018): Longitudinal structural brain development and externalizing behavior in adolescence. *Journal of Child Psychology and Psychiatry and Allied Disciplines* 59: 1061–1072.
9. Green KH, van de Groep S, Sweijen SW, Becht AI, Buijzen M, de Leeuw RNH, *et al.* (2021): Mood and emotional reactivity of adolescents during the COVID-19 pandemic: short-term and long-term effects and the impact of social and socioeconomic stressors. *Scientific Reports* 11. <https://doi.org/10.1038/s41598-021-90851-x>
10. Ebner-Priemer UW, Eid M, Kleindienst N, Stabenow S, Trull TJ (2009): Analytic Strategies for Understanding Affective (In)Stability and Other Dynamic Processes in Psychopathology. *Journal of Abnormal Psychology* 118: 195–202.
11. Larson RW, Moneta G, Richards MH, Wilson S (2002): Continuity, Stability, and Change in Daily Emotional Experience across Adolescence. *Child Development* 73: 1151–1165.
12. Maciejewski DF, van Lier PAC, Branje SJT, Meeus WHJ, Koot HM (2015): A 5-Year Longitudinal Study on Mood Variability Across Adolescence Using Daily Diaries. *Child Development* 86: 1908–1921.
13. Zimmermann P, Iwanski A (2014): Emotion regulation from early adolescence to emerging adulthood and middle adulthood: Age differences, gender differences, and emotion-specific developmental variations. *International Journal of Behavioral Development* 38: 182–194.
14. Short MA, Booth SA, Omar O, Ostlundh L, Arora T (2020, August 1): The relationship between sleep duration and mood in adolescents: A systematic review and meta-analysis. *Sleep Medicine Reviews*, vol. 52. W.B. Saunders Ltd. <https://doi.org/10.1016/j.smrv.2020.101311>
15. Galván A (2020): The Need for Sleep in the Adolescent Brain. *Trends in Cognitive Sciences* 24: 79–89.



16. Hagenauer MH, Perryman JI, Lee TM, Carskadon MA (2009): Adolescent changes in the homeostatic and circadian regulation of sleep. *Developmental Neuroscience* 31: 276–284.
17. Morin CM, Laval U, Ware QJC (1996): Sleep and psychopathology. *Applied & Preventive Psychology*, vol. 5. Cambridge University Press.
18. Ong SH, Wickramaratne P, Min Tang, Weissman MM (2006): Early childhood sleep and eating problems as predictors of adolescent and adult mood and anxiety disorders. *Journal of Affective Disorders* 96: 1–8.
19. Gregory AM, Caspi A, Eley TC, Moffitt TE, O'Connor TG, Poulton R (2005): Prospective longitudinal associations between persistent sleep problems in childhood and anxiety and depression disorders in adulthood. *Journal of Abnormal Child Psychology* 33: 157–163.
20. Hertenstein E, Feige B, Gmeiner T, Kienzler C, Spiegelhalder K, Johann A, *et al.* (2019, February 1): Insomnia as a predictor of mental disorders: A systematic review and meta-analysis. *Sleep Medicine Reviews*, vol. 43. W.B. Saunders Ltd, pp 96–105.
21. Baum KT, Desai A, Field J, Miller LE, Rausch J, Beebe DW (2014): Sleep restriction worsens mood and emotion regulation in adolescents. *Journal of Child Psychology and Psychiatry and Allied Disciplines* 55: 180–190.
22. Maslowsky J, Ozer EJ (2014): Developmental trends in sleep duration in adolescence and young adulthood: Evidence from a national United States sample. *Journal of Adolescent Health* 54: 691–697.
23. Short MA, Gradisar M, Lack LC, Wright H, Carskadon MA (2012): The discrepancy between actigraphic and sleep diary measures of sleep in adolescents. *Sleep Medicine* 13: 378–384.
24. Silvers JA (2022, April 1): Adolescence as a pivotal period for emotion regulation development for consideration at current opinion in psychology. *Current Opinion in Psychology*, vol. 44. Elsevier B.V., pp 258–263.
25. Wierenga LM, Langen M, Oranje B, Durston S (2014): Unique developmental trajectories of cortical thickness and surface area. *Neuroimage* 87: 120–126.
26. Shaw P, Kabani NJ, Lerch JP, Eckstrand K, Lenroot R, Gogtay N, *et al.* (2008): Neurodevelopmental trajectories of the human cerebral cortex. *Journal of Neuroscience* 28: 3586–3594.
27. Tamnes CK, Herting MM, Goddings A, Meuwese R, Blakemore S, Dahl XRE, *et al.* (2017): Development of the Cerebral Cortex across Adolescence: A Multisample Study of Inter-Related Longitudinal Changes in Cortical Volume, Surface Area, and Thickness. *The Journal of Neuroscience* 37: 3402–3412.
28. Tamnes CK, Østby Y, Fjell AM, Westlye LT, Due-Tønnessen P, Walhovd KB (2010): Brain maturation in adolescence and young adulthood: Regional age-related changes in cortical thickness and white matter volume and microstructure. *Cerebral Cortex* 20: 534–548.
29. Bos MGN, Peters S, van de Kamp FC, Crone EA, Tamnes CK (2018): Emerging depression in adolescence coincides with accelerated frontal cortical thinning. *Journal of Child Psychology and Psychiatry and Allied Disciplines* 59: 994–1002.
30. Ahmed SP, Bittencourt-Hewitt A, Sebastian CL (2015): Neurocognitive bases of emotion regulation development in adolescence. *Developmental Cognitive Neuroscience* 15: 11–25.
31. Blakemore SJ (2008, April): The social brain in adolescence. *Nature Reviews Neuroscience*, vol. 9. pp 267–277.

32. Silvers JA, Buhle JT, Ochsner KN, Silvers J (2014): The neuroscience of emotion regulation: Basic mechanisms and their role in development, aging and psychopathology. *The Handbook of Cognitive Neuroscience*. Oxford University Press.
33. Martin RE, Ochsner KN (2016, August 1): The neuroscience of emotion regulation development: Implications for education. *Current Opinion in Behavioral Sciences*, vol. 10. Elsevier Ltd, pp 142–148.
34. Casey BJ, Getz S, Galvan A (2008): The adolescent brain. *Developmental Review* 28: 62–77.
35. Somerville LH, Casey BJ (2010): Developmental neurobiology of cognitive control and motivational systems. *Current Opinion in Neurobiology*, vol. 20. Elsevier Ltd, pp 236–241.
36. Maciejewski DF, van Lier PAC, Neumann A, van der Giessen D, Branje SJT, Meeus WHJ, Koot HM (2014): The development of adolescent generalized anxiety and depressive symptoms in the context of adolescent mood variability and parent-adolescent negative interactions. *Journal of Abnormal Child Psychology* 42: 515–526.
37. Neumann A, van Lier PAC, Frijns T, Meeus W, Koot HM (2011): Emotional dynamics in the development of early adolescent psychopathology: A one-year longitudinal study. *Journal of Abnormal Child Psychology* 39: 657–669.
38. van der Crujisen R, Peters S, van der Aar LPE, Crone EA (2018): The neural signature of self-concept development in adolescence: The role of domain and valence distinctions. *Developmental Cognitive Neuroscience* 30: 1–12.
39. Crone E, Green K, van de Groep I, van der Crujisen R (2022): A neurocognitive model of self-concept development in adolescence. *under review*.
40. Curran SL, Andrykowski MA, Studts JL (1995): Short form of the Profile of Mood States (POMS-SF): Psychometric information. *Psychological Assessment* 7: 80–83.
41. van Buuren S, Groothuis-Oudshoorn K (2011): *Journal of Statistical Software Mice: Multivariate Imputation by Chained Equations in R*, vol. 45. Retrieved from <http://www.jstatsoft.org/>
42. Chorpita BF, Yim L, Moffitt C, Umemoto LA, Francis SE (2000): Assessment of symptoms of DSM-IV anxiety and depression in children: a revised child anxiety and depression scale. *Behaviour Research and Therapy* 38: 835–855.
43. Dale AM, Fischl B, Sereno MI (1999): Cortical surface-based analysis. I. Segmentation and surface reconstruction. *Neuroimage* 9: 179–194.
44. Reuter M, Schmansky NJ, Rosas HD, Fischl B (2012): Within-subject template estimation for unbiased longitudinal image analysis. *Neuroimage* 61: 1402–1418.
45. Desikan RS, Ségonne F, Fischl B, Quinn BT, Dickerson BC, Blacker D, *et al.* (2006): An automated labeling system for subdividing the human cerebral cortex on MRI scans into gyral based regions of interest. *Neuroimage* 31: 968–980.
46. Fischl B, Salat DH, Busa E, Albert M, Dieterich M, Haselgrove C, *et al.* (2002): Whole brain segmentation: Automated labeling of neuroanatomical structures in the human brain. *Neuron* 33: 341–355.
47. Mills KL, Goddings AL, Clasen LS, Giedd JN, Blakemore SJ (2014): The developmental mismatch in structural brain maturation during adolescence. *Developmental Neuroscience* 36: 147–160.
48. Quan M, Lee SH, Kubicki M, Kikinis Z, Rathi Y, Seidman LJ, *et al.* (2013): White matter tract abnormalities between rostral middle frontal gyrus, inferior frontal gyrus and striatum in first-episode schizophrenia. *Schizophrenia Research* 145: 1–10.

49. Bentley JN, Irwin ZT, Black SD, Roach ML, Vaden RJ, Gonzalez CL, *et al.* (2020): Subcortical Intermittent Theta-Burst Stimulation (iTBS) Increases Theta-Power in Dorsolateral Prefrontal Cortex (DLPFC). *Frontiers in Neuroscience* 14. <https://doi.org/10.3389/fnins.2020.00041>
50. Klapwijk ET, van de Kamp F, van der Meulen M, Peters S, Wierenga LM (2019): Qoala-T: A supervised-learning tool for quality control of FreeSurfer segmented MRI data. *Neuroimage* 189: 116–129.
51. Becht AI, Klapwijk ET, Wierenga LM, van der Crujisen R, Spaans J, van der Aar L, *et al.* (2020): Longitudinal associations between structural prefrontal cortex and nucleus accumbens development and daily identity formation processes across adolescence. *Developmental Cognitive Neuroscience* 46. <https://doi.org/10.1016/j.dcn.2020.100880>
52. Achterberg M, Becht A, van der Crujisen R, van de Groep IH, Spaans JP, Klapwijk E, Crone EA (2022): Longitudinal associations between social media use, mental well-being and structural brain development across adolescence. *Developmental Cognitive Neuroscience* 54. <https://doi.org/10.1016/j.dcn.2022.101088>
53. Wood SN (2004): Stable and efficient multiple smoothing parameter estimation for generalized additive models. *J Am Stat Assoc* 99: 673–686.
54. Wood SN (2017): Generalized additive models: An introduction with R, second edition. *Generalized Additive Models: An Introduction with R, Second Edition*. <https://doi.org/10.1201/9781315370279>
55. Wierenga LM, Bos MGN, van Rossenberg F, Crone EA (2019): Sex effects on development of brain structure and executive functions: Greater variance than mean effects. *Journal of Cognitive Neuroscience* 31: 730–753.
56. Khundrakpam BS, Lewis JD, Jeon S, Kostopoulos P, Itturia Medina Y, Chouinard-Decorte F, Evans AC (2019): Exploring Individual Brain Variability during Development based on Patterns of Maturational Coupling of Cortical Thickness: A Longitudinal MRI Study. *Cerebral Cortex* 29: 178–188.
57. Kessler RC, Berglund P, Demler O, Jin R, Merikangas KR, Walters EE (2005): Lifetime Prevalence and Age-of-Onset Distributions of DSM-IV Disorders in the National Comorbidity Survey Replication. *Arch Gen Psychiatry* 62: 593–602.
58. Zahn-Waxler C, Klimes-Dougan B, Slattery MJ (2000): Internalizing problems of childhood and adolescence: Prospects, pitfalls, and progress in understanding the development of anxiety and depression. *Development and Psychopathology* 12: 443–466.
59. Difrancesco S, Lamers F, Riese H, Merikangas KR, Beekman ATF, van Hemert AM, *et al.* (2019): Sleep, circadian rhythm, and physical activity patterns in depressive and anxiety disorders: A 2-week ambulatory assessment study. *Depression and Anxiety* 36: 975–986.
60. Herbert V, Pratt D, Emsley R, Kyle SD (2017): Predictors of nightly subjective-objective sleep discrepancy in poor sleepers over a seven-day period. *Brain Sciences* 7. <https://doi.org/10.3390/brainsci7030029>
61. Vijayakumar N, Whittle S, Yücel M, Dennison M, Simmons J, Allen NB (2014): Thinning of the lateral prefrontal cortex during adolescence predicts emotion regulation in females. *Social Cognitive and Affective Neuroscience* 9: 1845–1854.
62. Etkin A, Büchel C, Gross JJ (2015, November 1): The neural bases of emotion regulation. *Nature Reviews Neuroscience*, vol. 16. Nature Publishing Group, pp 693–700.

63. Ferschmann L, Vijayakumar N, Grydeland H, Overbye K, Mills KL, Fjell AM, *et al.* (2021): Cognitive reappraisal and expressive suppression relate differentially to longitudinal structural brain development across adolescence. *Cortex* 136: 109–123.
64. Wierenga LM, Bos MGN, Schreuders E, vd Kamp F, Peper JS, Tamnes CK, Crone EA (2018): Unraveling age, puberty and testosterone effects on subcortical brain development across adolescence. *Psychoneuroendocrinology* 91: 105–114.
65. Fjell AM, Chen CH, Sederevicius D, Sneve MH, Grydeland H, Krogsrud SK, *et al.* (2019): Continuity and Discontinuity in Human Cortical Development and Change from Embryonic Stages to Old Age. *Cerebral Cortex* 29: 3879–3890.
66. Vijayakumar N, Allen N, Dennison M, Byrne M, Simmons J, Whittle S (2017): Cortico-amygdalar maturational coupling is associated with depressive symptom trajectories during adolescence. *Neuroimage* 156: 403–411.
67. Gee DG, Humphreys KL, Flannery J, Goff B, Telzer EH, Shapiro M, *et al.* (2013): A developmental shift from positive to negative connectivity in human amygdala-prefrontal circuitry. *Journal of Neuroscience* 33: 4584–4593.
68. Tavernier R, Choo SB, Grant K, Adam EK (2016): Daily affective experiences predict objective sleep outcomes among adolescents. *Journal of Sleep Research* 25: 62–69.
69. Parsons CE, Schofield B, Batziou SE, Ward C, Young KS (2021): Sleep quality is associated with emotion experience and adaptive regulation of positive emotion: An experience sampling study. *Journal of Sleep Research*.  
<https://doi.org/10.1111/jsr.13533>
70. Baltasar-Tello I, Miguélez-Fernández C, Peñuelas-Calvo I, Carballo JJ (2018, August 1): Ecological Momentary Assessment and Mood Disorders in Children and Adolescents: a Systematic Review. *Current Psychiatry Reports*, vol. 20. Current Medicine Group LLC 1. <https://doi.org/10.1007/s11920-018-0913-z>
71. Sisk CL, Zehr JL (2005, October): Pubertal hormones organize the adolescent brain and behavior. *Frontiers in Neuroendocrinology*, vol. 26. pp 163–174.
